# Supplementary material for: Valorization of Biomasses from Energy Crops for the Discovery of Novel Thermophilic Glycoside Hydrolases through Metagenomic Analysis
Source: MDPI journal article supplement (doi:10.3390/ijms231810505), 2022-09-10
Supplement: s1 [file s1]

Table S1: Sequencing and assembly statistics

|                          | Rich       | Arundo     | Pretreated | Thistle    |
|--------------------------|------------|------------|------------|------------|
| Reads                    | 22,222,224 | 22,222,224 | 22,222,224 | 24,444,446 |
| Contigs $\geq$ 500 bp    | 1,338      | 1,751      | 1,368      | 549        |
| Contigs $\geq$ 1,000 bp  | 948        | 1,110      | 901        | 426        |
| Contigs $\geq$ 5,000 bp  | 353        | 213        | 177        | 158        |
| Contigs $\geq$ 10,000 bp | 161        | 81         | 86         | 87         |
| Contigs $\geq$ 25,000 bp | 48         | 27         | 26         | 29         |
| Contigs $\geq$ 50,000 bp | 20         | 12         | 10         | 10         |
| Largest contig           | 489,871    | 185,195    | 179,766    | 167,948    |
| Total length             | 8,138,047  | 5,734,578  | 4,976,681  | 3,768,893  |
| N50                      | 16,553     | 6,742      | 10,427     | 20,619     |
| N90                      | 2,397      | 1,164      | 1,212      | 2,844      |
| auN                      | 69,787     | 26,771     | 31,605     | 39,942     |
| L50                      | 80         | 138        | 84         | 42         |
| L90                      | 605        | 998        | 760        | 259        |
| Total ORFs               | 10,161     | 8,416      | 6,535      | 4,383      |
| Unique ORFs              | 9,947      | 8,334      | 6,439      | 4,300      |

Table S2: Purification of Aglu1

| Purification steps | Total protein (mg) | Total activity (U) | Specific activity (U/mg) | Yield (%) | Purification fold |
|--------------------|--------------------|--------------------|--------------------------|-----------|-------------------|
| Cell extract       | 844                |                    |                          |           |                   |
| 50°C               | 708                | 70                 | 0.10                     | 100       | 1                 |
| 60°C               | 180                | 63                 | 0.35                     | 90        | 3.5               |
| 70°C               | 48                 | 57                 | 1.2                      | 81        | 12                |
| 80°C               | 21                 | 52                 | 2.5                      | 75        | 25                |
| Q- Sepharose       | 19                 | 54                 | 3                        | 77        | 30                |
| Phenyl- Sepharose  | 2.5                | 24                 | 9.5                      | 34        | 95                |

Table S3: Percent of sequence identity of each domain, comparing Aglu1 with MalA (SSO3051) from *S. solfataricus* and SSaci1160 from *S. acidocaldarius*.

|           | Aglu1 vs MalA (% identity) | Aglu1 vs Saci1160 (% identity) |
|-----------|----------------------------|--------------------------------|
| Domain A  | 80                         | 54                             |
| Domain N  | 88                         | 48                             |
| Domain B  | 90                         | 36                             |
| Domain B' | 86                         | 30                             |
| Domain C  | 68                         | 49                             |
| Domain D  | 50                         | 21                             |
